# Supplementary material for: The Use of Selfie Camera Traps to Estimate Home Range and Movement Patterns of Small Mammals in a Fragmented Landscape
Source: MDPI journal article supplement (doi:10.3390/ani12070912), 2022-04-02
Supplement: s1 [file s1]

**Table S1.** Number of individual small mammals detected at various spatial samples on selfie traps positioned in the four areas within the study landscape.

|                            | Number of individuals detected at only |         |         |         |         |         |         |       |
|----------------------------|----------------------------------------|---------|---------|---------|---------|---------|---------|-------|
|                            | 1 site                                 | 2 sites | 3 sites | 4 sites | 5 sites | 6 sites | 8 sites | Total |
| Area 1                     |                                        |         |         |         |         |         |         |       |
| <i>Petaurus breviceps</i>  | 14                                     | 23      | 12      | 4       | 3       | 2       | 1       | 59    |
| <i>Antechinus stuartii</i> | 15                                     | 5       | 3       | 4       |         | 1       |         | 28    |
| <i>Rattus fuscipes</i>     | 1                                      |         |         |         |         |         |         | 1     |
| <i>Rattus norvegicus</i>   | 7                                      |         |         |         |         |         |         | 7     |
| Area 2                     |                                        |         |         |         |         |         |         |       |
| <i>P. breviceps</i>        | 23                                     | 21      | 22      | 12      | 4       | 1       |         | 83    |
| <i>A. stuartii</i>         | 20                                     | 4       |         | 1       |         |         |         | 25    |
| <i>R. fuscipes</i>         | 5                                      | 4       |         |         |         |         |         | 9     |
| <i>R. norvegicus</i>       | 1                                      |         |         |         |         |         |         | 1     |
| Area 3                     |                                        |         |         |         |         |         |         |       |
| <i>P. breviceps</i>        | 7                                      | 9       | 8       | 5       | 2       | 1       |         | 32    |
| <i>A. stuartii</i>         | 1                                      | 1       |         |         |         |         |         | 2     |
| <i>R. norvegicus</i>       | 5                                      | 3       |         |         |         |         |         | 8     |
| Area 4                     |                                        |         |         |         |         |         |         |       |
| <i>P. breviceps</i>        | 4                                      |         |         |         |         |         |         | 4     |
| <i>A. stuartii</i>         | 15                                     | 1       | 1       |         |         |         |         | 17    |
| <i>R. fuscipes</i>         | 2                                      |         |         |         |         |         |         | 2     |
| <i>R. norvegicus</i>       | 5                                      | 1       |         |         |         |         |         | 6     |
| Total                      | 125                                    | 72      | 46      | 26      | 9       | 5       | 1       | 284   |

**Table S2.** Short term home ranges (50% and 95%) using Kernel Density Estimate (KDE), of sugar gliders (*Petaurus breviceps*) detected at four or more sites (n = 34). Female n = 15, male n = 19. Home ranges estimates from Minimum Convex Polygons (MCP) was calculated by calculating the amount of available habitat within the polygon.

| Individual no. | Area | Fragment | Sex | Number of sites detected at | Recaptures (/24hr) | Distance moved (m) | KDE Home range 95% (ha) | KDE Home range 50% (ha) | MCP (ha) |
|----------------|------|----------|-----|-----------------------------|--------------------|--------------------|-------------------------|-------------------------|----------|
| 1              | A1   | Grid     | F   | 5                           | 10                 | 2425.44            | 5.69                    | 1.26                    | 2.12     |
| 2              | A1   | Grid     | M   | 4                           | 9                  | 702.58             | 3.94                    | 0.61                    | 2.14     |
| 3              | A3   | Linear   | M   | 5                           | 10                 | 1479.05            | 3.71                    | 1.00                    | 1.77     |
| 4              | A3   | Linear   | F   | 5                           | 14                 | 2397.75            | 3.33                    | 0.80                    | 1.77     |
| 5              | A3   | Linear   | M   | 4                           | 6                  | 2378.03            | 8.97                    | 1.60                    | 5.20     |
| 6              | A3   | Linear   | M   | 4                           | 13                 | 4438.07            | 5.77                    | 1.29                    | 4.40     |
| 7              | A3   | Linear   | M   | 4                           | 14                 | 3474.96            | 12.52                   | 3.95                    | 3.58     |
| 8              | A3   | Linear   | F   | 4                           | 20                 | 1791.58            | 3.39                    | 0.92                    | 1.06     |
| 9              | A3   | Grid     | M   | 6                           | 9                  | 2325.24            | 7.60                    | 1.40                    | 2.20     |
| 10             | A1   | Linear   | M   | 5                           | 9                  | 7145.37            | 16.44                   | 4.26                    | 1.19     |
| 11             | A1   | Linear   | M   | 4                           | 9                  | 1866.25            | 5.20                    | 1.01                    | 0.70     |
| 12             | A1   | Linear   | M   | 4                           | 7                  | 928.26             | 8.09                    | 3.83                    | 0.94     |
| 13             | A1   | Linear   | F   | 4                           | 7                  | 763.94             | 11.95                   | 2.43                    | 0.34     |
| 14             | A1   | Linear   | M   | 8                           | 25                 | 12014.52           | 7.72                    | 3.08                    | 4.48     |
| 15             | A1   | Linear   | M   | 6                           | 18                 | 4276.08            | 3.21                    | 1.42                    | 3.75     |
| 16             | A1   | Linear   | F   | 6                           | 27                 | 14660.74           | 6.23                    | 2.07                    | 1.45     |
| 17             | A1   | Linear   | F   | 5                           | 22                 | 8252.85            | 5.71                    | 2.32                    | 1.26     |
| 18             | A2   | Grid     | M   | 6                           | 20                 | 3122.04            | 5.83                    | 0.81                    | 3.59     |
| 19             | A2   | Grid     | M   | 5                           | 10                 | 643.31             | 11.29                   | 2.94                    | 2.80     |

|    |    |        |   |   |    |         |       |      |      |
|----|----|--------|---|---|----|---------|-------|------|------|
| 20 | A2 | Grid   | F | 5 | 16 | 1599.44 | 5.40  | 1.51 | 1.56 |
| 21 | A2 | Grid   | M | 4 | 7  | 1342.98 | 10.16 | 2.44 | 2.97 |
| 22 | A2 | Grid   | M | 4 | 17 | 2048.99 | 6.84  | 1.45 | 0.05 |
| 23 | A2 | Grid   | F | 4 | 20 | 1306.54 | 3.13  | 0.55 | 1.42 |
| 24 | A2 | Grid   | F | 4 | 9  | 1444.40 | 4.17  | 1.08 | 1.05 |
| 25 | A2 | Grid   | F | 4 | 10 | 1342.20 | 4.65  | 0.84 | 1.14 |
| 26 | A2 | Grid   | F | 4 | 14 | 2167.65 | 5.57  | 1.71 | 1.02 |
| 27 | A2 | Grid   | F | 5 | 21 | 1297.86 | 4.83  | 0.91 | 1.31 |
| 28 | A2 | Grid   | M | 4 | 6  | 515.08  | 4.40  | 1.09 | 1.29 |
| 29 | A2 | Linear | M | 5 | 8  | 2559.74 | 4.01  | 0.67 | 2.47 |
| 30 | A2 | Linear | M | 4 | 11 | 3437.96 | 6.45  | 0.52 | 1.35 |
| 31 | A2 | Linear | F | 4 | 19 | 2294.83 | 2.78  | 0.35 | 1.43 |
| 32 | A2 | Grid   | M | 4 | 12 | 1323.24 | 5.03  | 0.69 | 1.28 |
| 33 | A2 | Grid   | F | 4 | 23 | 771.67  | 2.26  | 0.56 | 0.92 |
| 34 | A2 | Grid   | F | 4 | 12 | 2914.36 | 6.01  | 1.32 | 1.14 |
